1 **A single nucleotide substitution in *TaHKT1;5-D* controls shoot Na<sup>+</sup> accumulation in**  
2 **bread wheat**

3

4 Chana Borjigin<sup>1,2</sup>, Rhiannon K. Schilling<sup>1,2</sup>, Jayakumar Bose<sup>2,3</sup>, Maria Hrmova<sup>1,2,4</sup>, Jiaen  
5 Qiu<sup>2,3</sup>, Stefanie Wege<sup>2,3</sup>, Apriadi Situmorang<sup>2</sup>, Chris Brien<sup>2,5</sup>, Bettina Berger<sup>2,5</sup>, Matthew  
6 Gilliham<sup>2,3</sup>, Allison S. Pearson<sup>1,2,3</sup>, Stuart J. Roy<sup>1,2,6</sup>

7

8 <sup>1</sup>Australian Centre for Plant Functional Genomics, The University of Adelaide, PMB 1, Glen  
9 Osmond, South Australia 5064, Australia; <sup>2</sup>School of Agriculture, Food and Wine, The  
10 University of Adelaide, PMB 1, Glen Osmond, South Australia 5064, Australia; <sup>3</sup>ARC Centre  
11 of Excellence in Plant Energy Biology, The University of Adelaide, PMB 1, Glen Osmond,  
12 South Australia 5064, Australia; <sup>4</sup>School of Life Sciences, Huaiyin Normal University,  
13 Huai'an 223300, China; <sup>5</sup>Australian Plant Phenomics Facility, The Plant Accelerator, The  
14 University of Adelaide, PMB 1, Glen Osmond, South Australia 5064, Australia; <sup>6</sup>ARC  
15 Industrial Transformation Research Hub for Wheat in a Hot Dry Climate, The University of  
16 Adelaide, PMB 1, Glen Osmond, South Australia 5064, Australia.

17

18 Rhiannon K. Schilling, School of Agriculture, Food and Wine, The University of Adelaide,  
19 PMB 1, Glen Osmond, South Australia 5064, Australia. E-mail:  
20 [rhiannon.schilling@adelaide.edu.au](mailto:rhiannon.schilling@adelaide.edu.au)

21

22 **Funding**

23 This project was funded by the Grains Research and Development Corporation (GRDC):  
24 Project UA00145, UA00151, and the GRDC and the International Wheat Yield Partnership  
25 (IWYP): Projects IWYP39/ACP0009; IWYP60/ANU00027. The Australian Centre for Plant

26 Functional Genomics (ACPGF) was jointly funded by the Australian Research Council (ARC)  
27 and the GRDC, SW was supported by the ARC DE160100804. The Plant Accelerator<sup>®</sup>,  
28 Australian Plant Phenomics Facility, is funded under the National Collaborative Research  
29 Infrastructure Strategy (NCRIS).

30

### 31 **Abstract**

32 Improving salinity tolerance in the most widely cultivated cereal, bread wheat (*Triticum*  
33 *aestivum* L.), is essential to increase grain yields on saline agricultural lands. A Portuguese  
34 landrace, Mocho de Espiga Branca accumulates up to 6 folds greater leaf and sheath sodium  
35 ( $\text{Na}^+$ ) than two Australian cultivars, Gladius and Scout, under salt stress. Despite high leaf  
36 and sheath  $\text{Na}^+$  concentrations, Mocho de Espiga Branca maintained similar salinity tolerance  
37 compared to Gladius and Scout. A naturally occurring single nucleotide substitution was  
38 identified in the gene encoding a major  $\text{Na}^+$  transporter *TaHKT1;5-D* in Mocho de Espiga  
39 Branca, which resulted in a L190P amino acid residue variation. This variant prevents Mocho  
40 de Espiga Branca from retrieving  $\text{Na}^+$  from the root xylem leading to a high shoot  $\text{Na}^+$   
41 concentration. The identification of the tissue tolerant Mocho de Espiga Branca will  
42 accelerate the development of more elite salt tolerant bread wheat cultivars.

43

### 44 **Keywords**

45 Bread wheat, salt tolerance, *TaHKT1;5-D*, sodium,  $\text{Na}^+$  transport, xylem sap  $\text{Na}^+$ , plant  
46 growth

## 47 **Introduction**

48 Globally, 45 million ha of irrigated and 32 million ha of dryland agricultural land is affected  
49 by salinity (FAO, 2019a). It is estimated that up to 1.2 million ha of land is lost to salinization  
50 each year (FAO, 2019a). To feed the rapidly growing human population, global food  
51 production must increase more than 70% by 2050, equating to an average increase of 44  
52 million metric tons per year (Tester & Langridge, 2010). Bread wheat (*Triticum aestivum*) is  
53 the most widely cultivated cereal crop, in terms of area and provides one fifth of the total  
54 calories consumed worldwide (FAO, 2019b). Improving the salinity tolerance of bread wheat  
55 to maximise yields on saline agricultural land is required.

56

57 Salinity affects plants in two distinct stages. Shoot ion-independent stress (osmotic stress)  
58 arises immediately after plants are exposed to salt, inducing rapid physiological responses,  
59 such as stomatal closure and slower cell expansion, resulting in reduced plant growth (Munns  
60 & Tester, 2008). Shoot ion-dependent stress (ionic stress) has a slower onset and occurs when  
61 salt, particularly Na<sup>+</sup> and Cl<sup>-</sup>, accumulate to high concentrations in the shoot (Munns &  
62 Tester, 2008). In this phase, reduced plant growth becomes more evident and premature leaf  
63 senescence occurs due to the toxicity of salt on cell metabolism (Munns & Tester, 2008).

64

65 Plants have three main mechanisms for tolerating salinity: osmotic stress tolerance via rapid,  
66 long distance signalling to maintain plant growth; ionic tissue tolerance by  
67 compartmentalising excessive Na<sup>+</sup> or Cl<sup>-</sup> in vacuoles to avoid accumulation to toxic  
68 concentrations in the cytoplasm, and the exclusion of Na<sup>+</sup> from the shoot by retrieving Na<sup>+</sup>  
69 from the xylem into the root or through efflux of Na<sup>+</sup> into the soil to maintain a low shoot  
70 Na<sup>+</sup> concentration (Munns & Tester, 2008).

71 The High-Affinity Potassium Transporter 1;5 (HKT1;5) is known to be responsible for  
72 retrieving  $\text{Na}^+$  from the transpiration stream in the root and preventing  $\text{Na}^+$  from  
73 accumulating to high concentrations in the shoot (Hamamoto, Horie, Hauser, Deinlein,  
74 Schroeder & Uozumi, 2015). Plant HKT proteins belong to the high-affinity  $\text{K}^+/\text{Na}^+$   
75 transporting Ktr/TrK/HKT superfamily and are divided into two groups based on a  
76 serine/glycine substitution in the first loop of the proteins (Platten, Cotsaftis, Berthomieu,  
77 Bohnert, Davenport, Fairbairn, Horie, Leigh, Lin, Luan, Maser, Pantoja, Rodriguez-Navarro,  
78 Schachtman, Schroeder, Sentenac, Uozumi, Very, Zhu, Dennis & Tester, 2006). Members of  
79 the HKT1 group with a serine residue, typically transport  $\text{Na}^+$ , while the HKT2 group with a  
80 glycine side chain generally transport both  $\text{Na}^+$  and  $\text{K}^+$  (Platten *et al.*, 2006). In *Arabidopsis*  
81 (*Arabidopsis thaliana*) overexpression of *AtHKT1;1* in root stellar cells reduced shoot  $\text{Na}^+$   
82 accumulation by up to 64% compared to null segregants (Moller, Gilliam, Jha, Mayo, Roy,  
83 Coates, Haseloff & Tester, 2009). In bread wheat, the *AtHKT1;1* ortholog, *TaHKT1;5-D*  
84 reduces shoot  $\text{Na}^+$  accumulation under salinity (Byrt, Xu, Krishnan, Lightfoot, Athman,  
85 Jacobs, Watson-Haigh, Plett, Munns, Tester & Gilliam, 2014). Durum wheat (*Triticum*  
86 *turgidum* L.), which lacks the D-genome accumulates high concentrations of  $\text{Na}^+$  in the leaf  
87 (Munns, Rebetzke, Husain, James & Hare, 2003). However, when *TmHKT1;5-A* (*Nax2* locus)  
88 from a wheat relative *Triticum monococcum* L. was introduced into a commercial durum  
89 wheat, a reduction in leaf  $\text{Na}^+$  concentration (James, Davenport & Munns, 2006) and a 25%  
90 improvement in grain yield in the field were observed (Munns, James, Xu, Athman, Conn,  
91 Jordans, Byrt, Hare, Tyerman, Tester, Plett & Gilliam, 2012).

92

93 Breeding of salt tolerant bread wheat cultivars has focused on selecting genotypes with  
94 improved shoot  $\text{Na}^+$  exclusion (Ashraf & O'leary, 1996, Poustini & Siosemardeh, 2004).  
95 However, selection based on shoot  $\text{Na}^+$  exclusion is not always correlated with increased

96 salinity tolerance in bread wheat (Genc, Oldach, Gogel, Wallwork, McDonald & Smith, 2013,  
97 Genc, Taylor, Lyons, Li, Cheong, Appelbee, Oldach & Sutton, 2019). Barley (*Hordeum*  
98 *vulgare* L.) is one of the most salt tolerant cereal crops and has much higher leaf Na<sup>+</sup>  
99 concentrations than bread wheat yet is able to maintain shoot growth in saline soils (Munns &  
100 Tester, 2008, Tilbrook, Schilling, Berger, Garcia, Trittermann, Coventry, Rabie, Brien,  
101 Nguyen & Tester, 2017). The identification of a bread wheat line that accumulates high shoot  
102 Na<sup>+</sup> concentrations whilst maintaining salinity tolerance, similar to barley, may accelerate the  
103 development of more salt tolerant bread wheat cultivars.

104

105 Here, we identified a Portuguese bread wheat landrace Mocho de Espiga Branca, which  
106 accumulated significantly higher leaf Na<sup>+</sup> concentrations while maintaining similar salinity  
107 tolerance as current commercial elite bread wheat cultivars. A naturally occurring single  
108 nucleotide polymorphism (SNP) in *TaHKT1;5-D* prevents Mocho de Espiga Branca from  
109 retrieving Na<sup>+</sup> from the root xylem, which results in a greater flux of Na<sup>+</sup> to the shoot and  
110 higher accumulation of Na<sup>+</sup> in leaf tissues.

111

## 112 **Materials and Methods**

### 113 **Plant materials and growth condition**

114 Two Australian commercial bread wheat cultivars Gladius and Scout and a set of 73 bread  
115 wheat diversity lines consisting of advanced cultivars, landraces and synthetic hexaploids  
116 were initially screened for salinity tolerance in this study (Garcia, Eckermann, Haefele, Satija,  
117 Sznajder, Timmins, Baumann, Wolters, Mather & Fleury, 2019). In the subsequent  
118 physiological characterizations, one of the 73 bread wheat diversity lines, a Portuguese  
119 landrace Mocho de Espiga Branca, and the commercial cultivars Gladius and Scout were

120 used. Plants in all the glasshouse experiments were grown under natural light with a daytime  
121 temperature at 22 °C and 15 °C at night.

122

### 123 **Screening of bread wheat diversity set in a pot trial**

124 A total of 75 lines (Gladius and Scout together with the 73 diversity lines) were screened for  
125 salinity tolerance in a fully automated conveyor system within a temperature controlled  
126 Smarthouse at the Australian Plant Phenomics Facility (The Plant Accelerator<sup>®</sup>, University of  
127 Adelaide, Australia; Latitude: -34.971366°, Longitude: 138.639758°) between August and  
128 September of 2014. Uniform sized seeds of each line were placed into 50 ml polypropylene  
129 tubes and imbibed in reverse osmosis (RO) water at room temperature for 4 h, tubes were  
130 drained and placed in the dark at 4 °C for three days before sowing. 3 seeds from each line  
131 were sown in a free-draining plastic pot (145 mm diameter × 190 mm height) filled with 2.5  
132 kg of a soil mixture (50% (v/v) University of California mix, 35% (v/v) peat mix and 15%  
133 (v/v) clay loam). The pots were arranged according to a split-plot experimental design with  
134 two consecutive pots forming a main plot. The lines were allocated to the main plots and  
135 were unequally replicated with Gladius and Scout replicated 12 times, 21 randomly-selected  
136 lines of the 73 diversity lines were replicated 4 times and the remaining 52 lines were  
137 replicated three times. The subplot design randomized the two treatment levels (0 and 100  
138 mM NaCl) in each main plot. The main plot design was a blocked row-and-column design  
139 generated using DiGGer (Coombes, 2009) and the subplot randomization was generated  
140 using dae(Brien, 2014), packages for the R statistical computing environment (R Core Team,  
141 2014). At the emergence of the 2<sup>nd</sup> leaf, plants were thinned to one uniformly sized plant per  
142 pot. At emergence of the 3<sup>rd</sup> leaf, pots were loaded onto an individual cart in the Smarthouse,  
143 where they were weighed daily and automatically watered to maintain the soil water content  
144 in each pot at 17% (w/w). At the emergence of the 4<sup>th</sup> leaf, 213 ml of either 0 or 170 mM

145 NaCl solution was applied to a saucer below each pot. Plants were not watered again until the  
146 soil water content reduced below 17% (w/w), and then each pot was watered again daily to  
147 maintain a final treatment concentration of 0 or 100 mM NaCl in the respective pot.

148

149 The shoot area of each plant was non-destructively imaged using a LemnaTec 3D Scanalyzer  
150 system (LemnaTec GmbH) for a total of 15 days (4 days before and 11 days after the NaCl  
151 treatment). Three red-green-blue (RGB) images (one top view and two side view images with  
152 a 90° angle) were recorded daily for each plant to calculate the projected shoot area (PSA) in  
153 pixels. 11 days after the NaCl treatment, the 4<sup>th</sup> leaf blade of each plant was collected,  
154 weighed and dried in an oven at 60 °C for two days before the dry weight was recorded. The  
155 dried 4<sup>th</sup> leaf blade was subsequently used for measuring Na<sup>+</sup>, K<sup>+</sup> and Cl<sup>-</sup> concentrations.

156

#### 157 **Determining leaf blade, leaf sheath and root Na<sup>+</sup> concentration in hydroponics**

158 To measure the Na<sup>+</sup>, K<sup>+</sup> and Cl<sup>-</sup> concentrations in the 4<sup>th</sup> leaf blade and sheath and roots,  
159 Mocho de Espiga Branca, Gladius and Scout were grown using a fully supported hydroponics  
160 system under three concentrations of NaCl (0, 150 and 200 mM) in a controlled glasshouse at  
161 The Plant Accelerator<sup>®</sup> between June and August 2017. The hydroponic system was  
162 equipped with a trolley fitted with two growth trays each containing 42 tubes filled with  
163 polycarbonate pellets and a tank containing 80 l of a modified Hoagland solution (mM):  
164 NH<sub>4</sub>NO<sub>3</sub> (0.2); KNO<sub>3</sub> (5.0); Ca(NO<sub>3</sub>)<sub>2</sub>·4H<sub>2</sub>O (2.0); MgSO<sub>4</sub>·7H<sub>2</sub>O (2.0); KH<sub>2</sub>PO<sub>4</sub> (0.1);  
165 Na<sub>2</sub>Si<sub>3</sub>O<sub>7</sub> (0.5); NaFe(III)EDTA (0.05); MnCl<sub>2</sub>·4H<sub>2</sub>O (0.005); ZnSO<sub>4</sub>·7H<sub>2</sub>O (0.01);  
166 CuSO<sub>4</sub>·5H<sub>2</sub>O (0.0005) and Na<sub>2</sub>MoO<sub>3</sub>·2H<sub>2</sub>O (0.0001). Uniform sized seeds from each  
167 genotype were surface sterilized using ultraviolet (UV) light for two min and germinated in  
168 petri dishes on moist filter paper for 4 days at room temperature before transplanting. 14  
169 replicates from each cultivar were grown in each treatment trolley. The NaCl treatment was

170 applied at the emergence of the 4<sup>th</sup> leaf by adding 116.88 g of NaCl twice daily for a 25 mM  
171 NaCl increment until a final concentration of either 150 mM or 200 mM was reached, and no  
172 NaCl was added to the 0 mM NaCl treatment. 3.8 g of supplemental CaCl<sub>2</sub>·2H<sub>2</sub>O was added  
173 into the 150 and 200 mM NaCl treatment tanks at each 25 mM NaCl increment in order to  
174 maintain constant Ca<sup>2+</sup> activity in all three treatments. The plants were irrigated by the  
175 nutrient solution in a 20 min flood and rain cycle and the complete nutrient solution was  
176 replaced every seven days. The pH of the solution was maintained between 6.5 and 7.0  
177 throughout the experiment using a 3.2% (v/v) HCl solution and a portable waterproof specific  
178 Ion–pH–mV–Temperature meter (Modal WP-90, TPS Pty Ltd, Australia). After 21 days of  
179 NaCl treatment, the 4<sup>th</sup> leaf blade and sheath and the remaining shoots were sampled  
180 separately and weighed. Plant roots were weighed after sampling and approximately 5 cm of  
181 the root tip was used for RNA extraction. The roots from the 150 mM and 200 mM  
182 treatments were rinsed in 10 mM CaSO<sub>4</sub> solution and blotted on paper towel to remove traces  
183 of NaCl before sampling. The weighed 4<sup>th</sup> leaf blade, 4<sup>th</sup> leaf sheath, shoots and roots were  
184 dried in an oven at 60 °C for two days to record the dry weight. The dried 4<sup>th</sup> leaf blade and  
185 sheath and root tissue were used for the subsequent Na<sup>+</sup>, K<sup>+</sup> and Cl<sup>-</sup> concentration analysis.

186

#### 187 **Na<sup>+</sup>, K<sup>+</sup> and Cl<sup>-</sup> concentration analysis**

188 The harvested dried 4<sup>th</sup> leaf blade and root samples were digested in 10 ml of 1% (v/v) HNO<sub>3</sub>  
189 (v/v), and the 4<sup>th</sup> leaf sheath was digested in 5 ml of 1% (v/v) HNO<sub>3</sub> (v/v) at 85 °C for 4 h in a  
190 SC154 HotBlock® (Environmental Express Inc., South Carolina, US). Na<sup>+</sup> and K<sup>+</sup>  
191 concentrations were measured using a flame photometer (Model 420; Sherwood Scientific  
192 Ltd., Cambridge, UK), and Cl<sup>-</sup> concentration was measured using a chloride analyzer (Model  
193 926; Sherwood Scientific Ltd., Cambridge, UK).



194 **RNA extraction and cDNA synthesis**

195 The harvested 5 cm root tips from the hydroponics experiment was snapped frozen in liquid  
196 nitrogen and stored at -80 °C until RNA extraction. The root tissue was ground to a fine  
197 powder using a 2010 Geno/Grinder® (SPEX SamplePrep) at 1000 ×g for 30 sec, and total  
198 RNA was extracted from the tissue powder using a Direct-Zol RNA MiniPrep kit with DNase  
199 I treatment (Zymo Research) according to the manufacturer's instruction. Final elution was  
200 performed with 40 µl DNA/RNAase-Free water supplied and the eluted RNA was  
201 subsequently quantified using a ND-1000 Spectrophotometer (NanoDrop Technologies) and  
202 quantified on a 1% (w/v) agarose gel (Bioline) by electrophoresis. cDNA synthesis was  
203 performed on 500 ng of RNA using High Capacity cDNA Reverse Transcription Kit (Thermo  
204 Fisher Scientific) according to the manufacturer's instruction in a 20 µl reaction and stored at  
205 -20 °C until use.

206

207 ***TaHKT1;5-D* coding sequence amplification and sequencing**

208 The entire coding sequence of the *TaHKT1;5-D* gene from Mocho de Espiga Branca, Gladius  
209 and Scout were amplified using Phusion® High-Fidelity DNA polymerase (New England  
210 Biolabs) following the manufacturer's instruction. The primers used for PCR amplification  
211 were: forward primer *cTaHKT1;5-D\_FP\_1* (5'-ATGGGTTCTTTGCATGTCTCCT-3') and  
212 reverse primer *cTaHKT1;5-D\_RP\_1551* (5'-TTATACTATCCTCCATGCCTCGC-3') (Table  
213 S3). PCR was conducted on a T100™ Thermal Cycler (Bio-Rad) using the following  
214 conditions: initial denaturation at 98 °C for 30 s, 35 cycles of 98 °C for 30 s, 64 °C for 30 s,  
215 72 °C for 1 min, final extension at 72 °C for 10 min and held at 4 °C. The PCR product was  
216 visualized on a 1% (w/v) agarose gel (Bioline) by electrophoresis at 90 V for 1 h and the 1.5  
217 kb target band was collected for purification using NucleoSpin® Gel and PCR Clean-up kit  
218 (Macherey-Nagel) according to the manufacturer's instruction prior to sequencing. Three

219 replicates from each of Mocho de Espiga Branca, Gladius and Scout *TaHKT1;5-D* coding  
220 sequence were tested with primers listed in Table S3 for Sanger sequencing carried out at the  
221 Australian Genome Research Facility (AGRF, South Australia).

222

### 223 ***TaHKT1;5-D* gene expression in roots**

224 To determine *TaHKT1;5-D* expression in Mocho de Espiga Branca, Gladius and Scout, a  
225 PCR was conducted on the synthesised cDNA in a 25 µl reaction consisting of 1 µl cDNA,  
226 0.5 µl each of 10 µM forward primer 5'-CGACCAGAAAAGGATAACAAGCAT-3' and  
227 reverse primer 5'-AGCCAGCTTCCCTTGCCAA-3', 5 µl *Taq* 5× Master Mix (New England  
228 Biolabs) and 18 µl Milli-Q water (18.2 MΩ cm). The final PCR products were visualized on  
229 a 1% (w/v) agarose gel (Bioline) by electrophoresis at 90 V for 1 h. The targeted *TaHKT1;5-*  
230 *D* product was 283 bp. The *TaGAP* gene (230 bp) was used as a positive control and a Milli-  
231 Q water sample was included as a negative control.

232

233 To quantify *TaHKT1;5-D* expression in the root tissue of Mocho de Espiga Branca, Gladius  
234 and Scout, Real-time PCR was performed on five replicates from each of the cultivars using  
235 an Applied Biosystems™ QuantStudio™ 6 Flex (Life Technologies). The reaction was  
236 performed in a 10 µl reaction consisting of two µL 1:20 diluted synthesised cDNA, 0.5 µl  
237 each of 10 µM forward and reverse primers stated above, 5 µl KAPA SYBR FAST 2×  
238 Master Mix (Sigma-Aldrich) and 2 µl Milli-Q water. The 283 bp final product from each  
239 cultivar was confirmed by Sanger sequencing carried out at AGRF (South Australia).

240

### 241 **DNA extraction and quantification**

242 Genomic DNA (gDNA) extraction of Mocho de Espiga Branca, Gladius, Scout and 70 bread  
243 wheat diversity lines was performed using a phenol/chloroform/iso-amyl alcohol extraction

244 method as described elsewhere with modifications (Rogowsky, Guidet, Langridge, Shepherd  
245 & Koebner, 1991). Briefly, the leaf tissue was frozen in a 10 ml tube at -80 °C and ground to  
246 a fine powder using a 2600 Cryo-Station (SPEX<sup>®</sup> SamplePrep) and a 2010 Geno/Grinder  
247 (SPEX<sup>®</sup> SamplePrep) at 1000 ×g for 30 s. 2 ml of gDNA extraction buffer [1% (w/v)  
248 sarkosyl, 100 mM Tris-HCl, 100 mM NaCl, 10mM EDTA, 2% (w/v) insoluble Polyvinyl-  
249 polypyrrolidone] was added to the ground tissue, vortexed, followed by the addition of 2 ml  
250 phenol/chloroform/iso-amyl alcohol (25:24:1). The sample was placed on ice for 20 min and  
251 vortexed thoroughly in every 5 min before centrifuging at 3630 ×g for 15 min. The  
252 supernatant was transferred into a labelled BD Vacutainer<sup>™</sup> SST<sup>™</sup> II Advance tube (Becton,  
253 Dickinson and Company, New Jersey, US) and 2 ml of phenol/chloroform/iso-amyl alcohol  
254 (25:24:1) was added. The sample was vortexed and centrifuged as above, and the supernatant  
255 was collected into a new 10 ml tube. The gDNA was precipitated using 2 ml of 100% (v/v)  
256 iso-propanol and 200 µl of 3 M sodium acetate (pH 4.8) and washed using 1 ml of 70% (v/v)  
257 ethanol before re-suspending overnight in 80 µl of R40 at 4°C. The re-suspended gDNA was  
258 quantified using a ND-1000 Spectrophotometer (NanoDrop Technologies).

259

### 260 **Cleaved Amplified Polymorphic Sequence (CAPS) assay and genotyping**

261 A CAPS marker *tsl2SALTY-4D* was designed to confirm the allele effect of the SNP (T/C)  
262 identified in Mocho de Espiga Branca *TaHKT1;5-D* for high leaf Na<sup>+</sup> concentration in  
263 comparison to Gladius and Scout. The extracted DNA from Mocho de Espiga Branca,  
264 Gladius, Scout and 68 bread wheat diversity lines were used for a PCR to amplify a 945 bp  
265 DNA fragment containing SNP. The PCR analysis was conducted in a 10 µl reaction  
266 consisting of 1 µg of DNA, 0.24 µl each of 10 µM forward primer 5'-  
267 ATGGGTCTTTGCATGTCTCCT-3' and reverse primer 5'-CGCTAGCACGAACGCCG-3',  
268 2 µl of *Taq* 5× Master Mix (New England Biolabs) and Milli-Q water. The reaction was

269 performed on a T100™ Thermal Cycler (Bio-Rad) using the following conditions: initial  
270 denaturation at 95 °C for 4 min, 35 cycles of 95 °C for 30 s, 56 °C for 30 s, 68 °C for 1 min,  
271 final extension at 68 °C for 5 min and held at 12 °C. The PCR amplification was followed by  
272 digestion using the restriction enzyme *FauI*. It was conducted in a 10 µl reaction consisting  
273 of 1 µg of the PCR products, 0.4 µl of *FauI* enzyme (New England Biolabs), 1 µl of 10×  
274 CutSmart® Buffer (New England Biolabs) and Milli-Q water. The digestion was performed  
275 on a T100™ Thermal Cycler (Bio-Rad) for 1 h at 55 °C followed by 20 min of inactivation at  
276 65 °C and held at 12 °C. The digested product was visualized on a 2% (w/v) agarose gel  
277 (Bioline) by electrophoresis at 90 V for 90 min and the genotype of each line at the SNP  
278 position was confirmed according to the product bands on the gel. Lines which had the C:C  
279 genotype had two fragments present at 573 and 372 bp, whilst lines carrying the T:T  
280 genotype had a single fragment present.

281

### 282 **Construction of 3D molecular models of TaHKT1;5-D and TaHKT1;5-D L190P**

283 The most suitable template for wheat HKT1;5 transporter proteins was the *B. subtilis* KtrB  
284 K<sup>+</sup> transporter (Protein Data Bank accession 4J7C, chain I) (Vieira-Pires, Szollosi & Morais-  
285 Cabral, 2013) as previously identified (Xu, Waters, Byrt, Plett, Tyerman, Tester, Munns,  
286 Hrmova & Gilliam, 2018). The K<sup>+</sup> ion in KtrB was substituted by Na<sup>+</sup> during modelling of  
287 TaHKT1;5 proteins. 3D models of TaHKT1;5-D and TaHKT1;5-D L190P in complex with  
288 Na<sup>+</sup> were generated with Modeller 9v19 (Sali & Blundell, 1993) as described previously  
289 (Cotsaftis, Plett, Shirley, Tester & Hrmova, 2012, Waters, Gilliam & Hrmova, 2013)  
290 incorporating Na<sup>+</sup> ionic radii (Xu *et al.*, 2018) taken from the CHARMM force field (Brooks,  
291 Brooks, Mackerell, Nilsson, Petrella, Roux, Won, Archontis, Bartels, Boresch, Caflisch,  
292 Caves, Cui, Dinner, Feig, Fischer, Gao, Hodoscek, Im, Kuczera, Lazaridis, Ma, Ovchinnikov,  
293 Paci, Pastor, Post, Pu, Schaefer, Tidor, Venable, Woodcock, Wu, Yang, York & Karplus,

294 2009), on the Linux station running the Ubuntu 12.04 operating system. Best scoring models  
295 (from an ensemble of 50) were selected based on the combination of Modeller Objective  
296 (Shen & Sali, 2006) and Discrete Optimised Protein Energy (Eswar, Eramian, Webb, Shen &  
297 Sali, 2008) functions, PROCHECK (Laskowski, Macarthur, Moss & Thornton, 1993), ProSa  
298 2003(Sippl, 1993) and FoldX (Schymkowitz, Rousseau, Martins, Ferkinghoff-Borg, Stricher  
299 & Serrano, 2005). Structural images were generated in the PyMOL Molecular Graphics  
300 System V1.8.2.0 (Schrödinger LLC, Portland, OR, USA). Calculations of angles between  
301 selected  $\alpha$ -helices in HKT1;5 models were executed in Chimera (Pettersen, Goddard, Huang,  
302 Couch, Greenblatt, Meng & Ferrin, 2004) and evaluations of differences ( $\Delta\Delta G = \Delta G_{mut}$ -  
303  $\Delta G_{wt}$ ) of Gibbs free energies was performed with FoldX (Schymkowitz *et al.*, 2005).  
304 Sequence conservation patterns were analysed with ConSurf (Celniker, Nimrod, Ashkenazy,  
305 Glaser, Martz, Mayrose, Pupko & Ben-Tal, 2013, Landau, Mayrose, Rosenberg, Glaser,  
306 Martz, Pupko & Ben-Tal, 2005) based on 3D models of TaHKT1;5-D using 370 sequences  
307 at the sequence identities of 30% and higher (specifications: HMMER homolog search  
308 algorithm, UNIREF-90 Protein database with the E-value cut-off of  $1 \times 10^{-4}$ , Bayesian Model  
309 of substitution for proteins.

310

### 311 **Characterization of TaHKT1;5-D from Mocho de Espiga Branca and Gladius in *X.***

#### 312 ***laevis* oocytes**

313  $\text{Na}^+$  transport properties of TaHKT1;5-D from Mocho de Espiga Branca and Gladius were  
314 characterized in *X. laevis* oocytes using two-electrode voltage clamping (TEVC) as  
315 previously described (Byrt *et al.*, 2014, Munns *et al.*, 2012). pGEMHE-DEST containing  
316 *TaHKT1;5-D* was linearized using sbfI-HF (New England Biolabs) before synthesising  
317 cRNA using the mMMESSAGE mMACHINE T7 Kit (Ambion) following manufacturer's  
318 instructions. 46 nl/23 ng of the cRNA from Mocho de Espiga Branca or Gladius, or equal

319 volumes of RNA-free water (H<sub>2</sub>O control) were injected into oocytes. Injected oocytes were  
320 incubated for 48 h and TEVC was carried out as described (Munns *et al.*, 2012). Membrane  
321 currents were recorded in the HMg solution (6 mM MgCl<sub>2</sub>, 1.8 mM CaCl<sub>2</sub>, 10 mM MES, and  
322 pH 6.5 adjusted with a Tris base) ± Na<sup>+</sup> glutamate. The osmolality of the solution was  
323 adjusted to 240 - 260 mOsmol/Kg using mannitol and a micro-osmometer (Model 210, Fiske  
324 Associates Inc, USA).

325

### 326 **Subcellular localisation of TaHKT1;5-D**

327 Transient expression of fluorescent fusion proteins was performed as previously described  
328 (Henderson, Wege, Qiu, Blackmore, Walker, Tyerman, Walker & Gilliam, 2015). In brief,  
329 *TaHKT1;5-D* coding sequences of Mocho de Espiga Branca and Gladius were recombined  
330 into pMDC43 (Curtis & Grossniklaus, 2003) to generate N-terminally green fluorescent  
331 protein (GFP) tagged proteins. The red fluorescent protein (RFP) tagged plasma membrane  
332 marker nCBL1-RFP that was used for co-localisation (Batistic, Sorek, Schultke, Yalovsky &  
333 Kudla, 2008). All constructs were transformed into *Agrobacterium tumefaciens* strain Agl-1  
334 and agro-infiltration was performed on fully expanded leaves of 4 to 6 weeks old tobacco  
335 (*Nicotiana benthamiana*) plants (Henderson *et al.*, 2015). After two to three days, leaf  
336 sections were imaged using a Nikon A1R Confocal Laser-Scanning Microscope equipped  
337 with a 63× water objective lens and NIS-Elements C software (Nikon Corporation).  
338 Excitation/emission conditions were GFP (488 nm/500–550 nm) and RFP (561 nm/570–620  
339 nm).

340

### 341 **Xylem sap Na<sup>+</sup> and K<sup>+</sup> concentration analysis**

342 Xylem sap was collected from hydroponically grown plants of Mocho de Espiga Branca and  
343 Gladius at 0 and 150 mM NaCl after 21 days from the start of the NaCl treatment. The shoot

344 was cut off at the base of the plant and inserted into a Scholander-type pressure chamber  
345 (Model 1005, PMS Instrument Company, USA) to extrude the xylem sap by slowly filling  
346 the chamber with compressed air. The sap was immediately collected into a clean, pre-  
347 weighed 1.5 ml tube. From the 0 mM NaCl treatment, xylem sap of seven plants from each  
348 cultivars was collected, and xylem sap of eight Mocho de Espiga Branca and seven Gladius  
349 plants was collected from the 150 mM NaCl treatment. Tubes containing the xylem sap was  
350 weighed for each plant and the samples were stored at 4°C until Na<sup>+</sup> and K<sup>+</sup> concentrations  
351 were measured using a flame photometer (Model 420, Sherwood Scientific Ltd., Cambridge,  
352 UK).

353

354 **Net and total Na<sup>+</sup>, K<sup>+</sup> and H<sup>+</sup> flux analyses using Microelectrode Ion Flux Estimation**  
355 **(MIFE)**

356 To investigate whether there were differences in Na<sup>+</sup>, K<sup>+</sup> and H<sup>+</sup> transport in the plant roots  
357 between Mocho de Espiga Branca and Gladius, net fluxes of Na<sup>+</sup>, K<sup>+</sup> and H<sup>+</sup> were measured  
358 at root maturation and elongation zones using the non-invasive MIFE technique (University  
359 of Tasmania, Hobart, Australia) (Bose, Rodrigo-Moreno, Lai, Xie, Shen & Shabala, 2015,  
360 Newman, 2001).

361 Root Na<sup>+</sup> retrieval measurements were performed at the elongation zone (approximately 600  
362 µm from the root cap). Uniform sized sterilized seeds from Mocho de Espiga Branca and  
363 Gladius were germinated on moist filter paper in Petri dishes covered with aluminium foil, at  
364 4 °C overnight and then placed at room temperature in the dark for three days before  
365 transplanting. 12 seedlings from each cultivar were transplanted into a hydroponic tank  
366 containing 10 L modified Hoagland solution as previously described. NaCl was added into  
367 the solution at an increment of 25 mM (14.16 g) twice daily for two days to achieve a final  
368 concentration of 100 mM NaCl. The pH of the solution was maintained between 6.5 and 7.0

369 throughout the experiment using 3.2% (v/v) of the HCl solution and a portable waterproof  
370 specific Ion–pH–mV–Temperature meter (Modal WP-90, TPS Pty Ltd, Australia). Two days  
371 after being exposed to 100 mM NaCl, the entire roots of Mocho de Espiga Branca ( $n = 9$ ) and  
372 Gladius ( $n = 8$ ) were first preconditioned in BSM solution containing 100 mM NaCl (0.2 mM  
373 KCl + 0.1 mM  $\text{CaCl}_2 \cdot 2\text{H}_2\text{O}$  + 100 mM NaCl) in a Petri dish for 30 min and then the primary  
374 root was immobilized on a 10 ml perspex measuring chamber containing 7 ml of the same  
375 BSM medium. The steady-state fluxes were measured for 5 min in the initial BSM solution  
376 before changing the bathing solution to 7 ml of the new BSM medium solution containing 0.6  
377 mM NaCl (0.2 mM KCl + 0.1 mM  $\text{CaCl}_2 \cdot 2\text{H}_2\text{O}$  + 0.6 mM NaCl). The resulting fluxes were  
378 measured for 25 min and the integral of each replication was added to derive the cumulative  
379 total fluxes. The osmolality of the two BSM solutions and the Hoagland solution were  
380 maintained between 208 and 222 mOsmol/kg using mannitol and a vapour pressure  
381 osmometer (Model 5500, Wescor, Inc., USA).

382

383 Root  $\text{Na}^+$  uptake measurements were performed at the maturation zone (beyond 2.5 cm from  
384 root tip), uniform sized sterilized seeds were germinated as described above, placed at 4 °C  
385 overnight and placed at room temperature in the dark for three days before measurement. The  
386 primary root of Mocho de Espiga Branca ( $n = 12$ ) and Gladius ( $n = 11$ ) seedlings was  
387 immobilized on a 10 ml perspex measuring chamber containing 6 ml of the BSM solution  
388 (0.2 mM KCl + 0.1 mM  $\text{CaCl}_2 \cdot 2\text{H}_2\text{O}$  + 0.6 mM NaCl) and pre-conditioned for 20 min before  
389 recording steady-state  $\text{Na}^+$ ,  $\text{K}^+$  and  $\text{H}^+$  fluxes for 5 min then 100 mM NaCl was added and the  
390 resulting fluxes were recorded for 25 min.

391

392

393



394 **Statistical analysis**

395 Prism 7 for Windows (version 7.02; GraphPad Software, Inc.) was used to generate graphs.  
396 GenStat<sup>®</sup> 15<sup>th</sup> edition for Microsoft Windows (version 15.3.09425; VSN International Ltd,  
397 UK) was used to perform an Analysis of Variance (ANOVA) and Tukey's multiple  
398 comparison test was used to determine which means were significantly different at a  
399 probability level of  $p \leq 0.05$ .

400

401 **Results**

402 **Mocho de Espiga Branca has high leaf and sheath Na<sup>+</sup> concentrations**

403 Screening of 75 bread wheat accessions for salinity tolerance under 100 mM NaCl, identified  
404 a Portuguese landrace, Mocho de Espiga Branca, which had a similar salinity tolerance but  
405 accumulated 7 folds higher Na<sup>+</sup> concentration in the 4<sup>th</sup> leaf compared to all other lines,  
406 including Gladius and Scout (Figure 1 and Table S1). The 4<sup>th</sup> leaf K<sup>+</sup> and Cl<sup>-</sup> concentrations  
407 of the 75 wheat lines were comparable under 100 mM NaCl (Table S1).

408

409 In hydroponics, Mocho de Espiga Branca maintained a similar shoot and root biomass to  
410 Gladius and Scout at 0, 150 and 200 mM NaCl (Figure 2a and Figure S1a,b), and all three  
411 cultivars had comparable salinity tolerance at 150 mM (0.69, 0.64 and 0.60, respectively) and  
412 200 mM NaCl (0.39, 0.49 and 0.39, respectively) (Figure S1c,d). The 4<sup>th</sup> leaf blade and  
413 sheath Na<sup>+</sup> concentrations were up to 6 folds higher in Mocho de Espiga Branca than Gladius  
414 and Scout at 150 mM NaCl (Figure 2b,c). At 200 mM NaCl, 4<sup>th</sup> leaf blade and sheath Na<sup>+</sup>  
415 concentrations in Mocho de Espiga Branca were 5 folds greater compared to Gladius and  
416 Scout (Figure 2b,c). There was no difference in root Na<sup>+</sup> concentration at all NaCl treatments  
417 (Figure 2d).

418

419 All three cultivars had similar  $K^+$  concentrations in the 4<sup>th</sup> leaf blade and sheath under 0 mM  
420 NaCl (Figure S2a). At 150 and 200 mM NaCl, Mocho de Espiga Branca accumulated 70-79%  
421 less  $K^+$  in the blade and 61-67% less  $K^+$  in the sheath compared to Gladius and Scout (Figure  
422 S2a, b). The root  $K^+$  concentration in Mocho de Espiga Branca was similar to Scout but  
423 significantly lower than Gladius under 0 mM NaCl, while no differences were observed  
424 between the three cultivars under 150 and 200 mM NaCl (Figure S2c).

425

426 The 4<sup>th</sup> leaf blade and sheath  $Cl^-$  concentrations in Mocho de Espiga Branca, Gladius and  
427 Scout were similar under 0 mM NaCl (Figure S2d,e). Mocho de Espiga Branca accumulated  
428 significantly higher  $Cl^-$  than Gladius and Scout in both tissues under 150 and 200 mM NaCl  
429 (Figure S2d,e). There were no significant differences in root  $Cl^-$  concentrations at 0 mM NaCl  
430 (Figure S2f). Mocho de Espiga Branca had significantly higher  $Cl^-$  than Gladius and Scout at  
431 150 mM NaCl but only significantly higher than Scout at 200 mM NaCl (Figure S2f).

432

### 433 **A natural single nucleotide substitution in the *TaHKT1;5-D* gene of Mocho de Espiga** 434 **Branca alters $Na^+$ transport properties of the protein**

435 A natural single SNP (T/C) in the coding sequence of *TaHKT1;5-D* was identified at the  
436 569<sup>th</sup> base pair in Mocho de Espiga Branca, while the sequence of Gladius and Scout was  
437 identical to Chinese Spring (Figure 3a). The SNP in Mocho de Espiga Branca resulted in an  
438 amino acid residue change from Leucine (L) to Proline (P) at the 190<sup>th</sup> residue in the  $Na^+$   
439 transporter protein *TaHKT1;5-D* (Figure 3a). This L190P variant residue is predicted to be  
440 located on the 4<sup>th</sup> transmembrane  $\alpha$ -helix in the area of the second glycine residue of the S78-  
441 G233-G353-G457 selectivity filter motif (Figure 3b). Expression analysis of the *TaHKT1;5-*  
442 *D* in Mocho de Espiga Branca, Gladius and Scout showed no significant difference in  
443 expression (Figure S3a,b). A cleaved amplified polymorphic sequence (CAPS) marker

444 *tsl2SALTY-4D* designed to this SNP in *TaHKT1;5-D* was used to genotype 71 diversity lines  
445 (Figure S3c and Table S2). Mocho de Espiga Branca carried the C:C allele responsible for the  
446 *TaHKT1;5-D* L190P variation, while all other lines had the T:T allele as *Gladius* and *Scout*  
447 (Figure S3c and Table S2).

448

449 3D molecular modelling revealed that overall folds of *TaHKT1;5-D* and *TaHKT1;5-D* L190P  
450 were similar (Figure 3c,d). Detailed analysis of the microenvironments around  $\alpha$ -helix 4 and  
451  $\alpha$ -helix 5 (two black arrows pointing to each other in Figure 3d), revealed that L190 in  $\alpha$ -  
452 helix 4 of *TaHKT1;5-D* (Figure 3d left) established four polar contacts at separations  
453 between 2.6 Å to 3.2 Å with V186, V187, Y193 and S194 neighbouring residues. These  
454 extensive polar contacts were not formed in the *TaHKT1;5-D* L190P variant (Figure 3d right),  
455 which only established one polar contact at the separation at 2.7 Å. In *TaHKT1;5-D*, the  
456 packing angle between  $\alpha$ -helix 4 (carrying L190P) and the neighbouring  $\alpha$ -helix 5 was 16°  
457 sharper than that in *TaHKT1;5D* L190P (Figure 3d). Sequence conservation patterns, based  
458 on 3D models of *TaHKT1;5-D* revealed that the P190 position in *TaHKT1;5-D* could not be  
459 found in databases, meaning that L190 could only be replaced by F, G, L, V, I, M, A, K and  
460 T, but not by P. Evaluation of differences of Gibbs free energies of *TaHKT1;5-D* revealed  
461 that the L190P mutation was energetically highly unfavourable (highly destabilising), and  
462 that the reverse mutation (P190 into L190) restored 70% of this energy loss.

463

464 To examine the effect of the L190P variant in the Na<sup>+</sup> transport properties of the *TaHKT1;5-*  
465 *D* transporter, *TaHKT1;5-D* cRNA from Mocho de Espiga Branca or *Gladius* was introduced  
466 in *X. laevis* oocytes. When exposed to different concentrations of Na<sup>+</sup> glutamate (1 and 30  
467 mM Na<sup>+</sup>), the oocytes with *TaHKT1;5-D* from *Gladius* had a significantly higher Na<sup>+</sup> elicited  
468 inward current, whereas those with *TaHKT1;5-D* from Mocho de Espiga Branca had limited

469 current, similar to the H<sub>2</sub>O-injected oocytes (Figure 4a). The TaHKT1;5-D from *Gladius*  
470 showed a positive reversal potential shift when exposed to 30 mM Na<sup>+</sup> which was not  
471 observed with TaHKT1;5-D L190P from Mocho de Espiga Branca (Figure 4a).

472

473 Transient expression of N-terminally GFP-tagged TaHKT1;5-D variants in *Nicotiana*  
474 *benthamiana* leaves revealed differences in GFP-signal pattern (Figure 4b). The majority of  
475 GFP-TaHKT1;5-D signal co-localised with the plasma membrane (PM) marker CBL1n-RFP,  
476 and a minor fraction to mobile subcellular organelles (Figure 4b). GFP-signal in leaves  
477 infiltrated with GFP-TaHKT1;5-D L190P, however, localised to internal cell structures,  
478 including a faint cytosolic signal and brighter non-mobile structures (Figure 4b). Suggesting  
479 the TaHKT1;5-D L190P might get degraded; possibly due to instability of the protein as  
480 revealed by homology modelling.

481

482 The Na<sup>+</sup> transport properties of the TaHKT1;5-D L190P variant was further investigated by  
483 comparing the xylem sap Na<sup>+</sup> concentrations of Mocho de Espiga Branca and *Gladius* grown  
484 hydroponically under 0 and 150 mM NaCl. Mocho de Espiga Branca accumulated a 3.5 folds  
485 greater xylem sap Na<sup>+</sup> than *Gladius* at 150 mM NaCl, while no significant differences were  
486 observed at 0 mM NaCl (Figure 4c). There was no significant difference for xylem sap K<sup>+</sup>  
487 and Cl<sup>-</sup> concentrations for either cultivar (Figure S4a,b).

488

489 The ability of Mocho de Espiga Branca to influx or efflux Na<sup>+</sup> at the root elongation zone  
490 was assessed in five day old seedlings using a basal salt medium (BSM) with ion fluxes  
491 monitored for 25 min. In the first minute after being exposed to 0.6 mM NaCl, Mocho de  
492 Espiga Branca and *Gladius* had an increase in net Na<sup>+</sup> efflux up to 10000 and 35000 nmol/m<sup>2</sup>  
493 s<sup>-1</sup> respectively compared to the BSM with 100 mM NaCl (Figure 5a). However, Mocho de

494 Espiga Branca changed within the first minute to Na<sup>+</sup> influx, while Gladius maintained Na<sup>+</sup>  
495 efflux for the duration of measurement (Figure 5a). The transient net K<sup>+</sup> efflux was greater in  
496 Mocho de Espiga Branca than Gladius and the efflux rates gradually dropped to below 1000  
497 nmol/m<sup>2</sup> s<sup>-1</sup> in both cultivars (Figure 5b). Mocho de Espiga Branca had a net H<sup>+</sup> influx for 25  
498 min, while Gladius initially became a net influxer for 8 min and then reverted to being a net  
499 effluxer for the remainder of the experiment after exposure to 0.6 mM Na<sup>+</sup> (Figure 5c).  
500 Overall, Mocho de Espiga Branca had greater total Na<sup>+</sup> influx, K<sup>+</sup> efflux and H<sup>+</sup> influx  
501 compared to Gladius at the root elongation zone (Figure 5 d,e,f).

502

503 In contrast, both cultivars had net Na<sup>+</sup> influx for the first few minutes followed by a gradual  
504 net efflux at the maturation zone of the primary root (Figure S5a). As expected salt stress  
505 induced K<sup>+</sup> efflux in both cultivars (Figure S5b). However, there was no significant  
506 difference in net or total Na<sup>+</sup> and K<sup>+</sup> fluxes observed between the two cultivars, while Mocho  
507 de Espiga Branca had 2 folds greater net H<sup>+</sup> efflux than Gladius (Figure S5 a-f).

508

## 509 **Discussion**

510 A bread wheat landrace, Mocho de Espiga Branca, was identified with significantly higher  
511 leaf Na<sup>+</sup> concentrations and the ability to maintain growth under high salinity. DNA  
512 sequencing revealed a naturally occurring SNP in the coding region of the Na<sup>+</sup> transporter  
513 TaHKT1;5-D, resulting in a L190P amino acid residue change. This variation disrupted the  
514 capability of TaHKT1;5-D to retrieve Na<sup>+</sup> from the xylem, due to the protein being unable to  
515 transport Na<sup>+</sup> and/or degradation of the TaHKT1;5-D L190P variant.

516 3D structural modelling of TaHKT1;5-D and TaHKT1;5-D L190P revealed the important  
517 role of the L190P substitution in determining the functional properties of Na<sup>+</sup> transport in

518 TaHKT1;5-D. The lack of the cooperative binding networks around  $\alpha$ -helix 4 of TaHKT1;5-  
519 D L190P within the P190 environment (Figure 3d) imposes a severe structural rigidity on the  
520 3D folding of this transporter. The more obtuse packing angle between  $\alpha$ -helix 4 and  $\alpha$ -helix  
521 5 of TaHKT1;5-D L190P compared to that in TaHKT1;5-D, indicated that the proline  
522 position affects packing of  $\alpha$ -helices in this specific environment (Figure 3d). Therefore, this  
523  $\alpha$ -helix is unlikely to function properly in the structural context preventing  $\text{Na}^+$  ion  
524 conductance. In TaHKT1;5-D, a positive correlation was identified between structural  
525 characteristics of  $\alpha$ -helix 4 and  $\alpha$ -helix 5 (trends in angles based on  $\alpha$ -helical planes),  
526 differences in Gibbs free energies of forward (L190P) and reverse (P190L) mutations and the  
527 ability to conduct  $\text{Na}^+$ . The inability of the Mocho de Espiga Branca L190P variant to  
528 transport  $\text{Na}^+$  was confirmed by expressing the gene in *X. laevis* oocytes (Figure 4a).

529

530 Studies also identified differences between the location of the Mocho de Espiga Branca  
531 L190P variant and common TaHKT1;5-Ds. Unlike common TaHKT1;5-Ds, which are  
532 localised on the plasma membrane of stelar cells, the L190P variant exhibited greater  
533 localisation of GFP signal in internal, non-moving structures (Figure 4b), suggesting the  
534 protein is being retained internally and/or is being targeted for degradation. Whether the  
535 TaHKT1;5-D L190P is functional and/or not on the correct membrane, Mocho de Espiga  
536 Branca will not be able retrieve  $\text{Na}^+$  from the xylem (Figure 4c), explaining why this  
537 accession has high leaf blade and leaf sheath  $\text{Na}^+$  (Figure 2b,c).

538

539 This work is, to our knowledge, the first that shows a naturally occurring mutation in  
540 *TaHKT1;5* directly effects both the  $\text{Na}^+$  transport properties of the protein and the plant  
541 phenotype. Previously, differences in the amino acid sequences between Nipponbare and  
542 Pokkali *OsHKT1;5* were hypothesised to be responsible for differences in shoot  $\text{Na}^+$

543 accumulation, however, the transport properties of these proteins were not directly tested  
544 (Cotsaftis *et al.*, 2012), a similar observation was recently made in barley (van Bezouw,  
545 Janssen, Ashrafuzzaman, Ghahramanzadeh, Kilian, Graner, Visser & van der Linden, 2019).  
546 Similarly artificially induced mutations in TmHKT1;5-A, which occurred during cloning of  
547 the gene, were shown to disrupt Na<sup>+</sup> transport properties in *X. laevis* but this was not linked  
548 to a plant phenotype (Xu *et al.*, 2018). A similar natural HKT1;5 variant (L189P) has recently  
549 been identified in barley accessions accumulating high grain Na<sup>+</sup> concentration, which also  
550 lacked the ability to transport Na<sup>+</sup> in *X. laevis* oocytes and was similarly shown to be on  
551 internal subcellular structures (Houston *et al.* unpublished).

552

553 Both Mocho de Espiga Branca and Gladius had similar concentrations of K<sup>+</sup> in the xylem sap  
554 (Figure S4a), however Mocho de Espiga Branca accumulated less K<sup>+</sup> in the leaf blade and  
555 sheath (Figure S2a,b). The greater K<sup>+</sup> efflux at the root elongation zone in Mocho de Espiga  
556 Branca (Figure 5b,e) suggests the significant reduction in K<sup>+</sup> in the leaf blade and sheath is  
557 associated with increased K<sup>+</sup> leakage from the roots. Root Na<sup>+</sup> and K<sup>+</sup> concentrations were  
558 similar between the two cultivars (Figure 2d and Figure S2c), even though there was a greater  
559 root Na<sup>+</sup> influx (Figure 5a,d), increased shoot Na<sup>+</sup> (Figure 2b,c), a higher root K<sup>+</sup> efflux  
560 (Figure 5b,e) and reduced shoot K<sup>+</sup> (Figure S2a,b) in Mocho de Espiga Branca. Bread wheat  
561 may have a mechanism, which enables the maintenance of optimal root Na<sup>+</sup> and K<sup>+</sup>  
562 concentrations contributing to the tolerance of the whole plant to salinity stress. In both  
563 cultivars, a high concentration of Cl<sup>-</sup> was transported in the xylem sap (Figure S4b), which  
564 accumulated in the leaf sheath to a greater extent than the leaf blade (Figure S2d,e). This is in  
565 agreement with previous findings of Cl<sup>-</sup> partitioning into the leaf sheath in response to  
566 salinity and suggests that the leaf sheath may have an important role in Cl<sup>-</sup> exclusion

567 preventing it from accumulating to toxic concentrations in the leaf blade (Boursier & Läuchli,  
568 1989, Boursier, Lynch, Lauchli & Epstein, 1987).

569

570 Based on the observed functional defects in Na<sup>+</sup> transport resulting from the *TaHKT1;5-D*  
571 L190P variant and the ion analysis findings in this study, we propose a model to compare  
572 root-to-shoot ion transport between Mocho de Espiga Branca and *Gladius* (Figure 6). Due to  
573 the naturally occurring SNP in *TaHKT1;5-D*, we suggest that Mocho de Espiga Branca has  
574 impaired retrieval of Na<sup>+</sup> from the root xylem which results in a greater influx of Na<sup>+</sup> in the  
575 xylem sap and a higher accumulation in the leaf blade and sheath compared to *Gladius*  
576 (Figure 6).

577

578 The results of this study confirm the importance of *TaHKT1;5-D* in the Na<sup>+</sup> exclusion  
579 mechanism of bread wheat to limit the levels of Na<sup>+</sup> that accumulate. It is evident, however,  
580 that *TaHKT1;5-D* does not represent the only mechanism responsible for the salinity  
581 tolerance of a whole plant, as Mocho de Espiga Branca maintained similar tolerance to  
582 *Gladius* and *Scout* despite carrying the non-functional *TaHKT1;5-D*. It appears that although  
583 *TaHKT1;5-D* has a key role in Na<sup>+</sup> exclusion, salinity tolerance in bread wheat may not  
584 necessarily be entirely related to the plants ability to maintain a low shoot Na<sup>+</sup> concentration.  
585 The lack of a relationship between shoot Na<sup>+</sup> concentration and salinity tolerance in bread  
586 wheat has been observed in other studies (Genc, McDonald & Tester, 2007, Genc *et al.*,  
587 2019). This raises the question of how Mocho de Espiga Branca and these other bread wheat  
588 accessions maintain growth despite accumulating a high concentration of shoot Na<sup>+</sup>? There  
589 must be other tolerance mechanisms, such as tissue tolerance, that are responsible for the  
590 plant's ability to tolerate high shoot Na<sup>+</sup> concentrations under salinity. Tissue tolerance  
591 mechanisms, such as vacuolar Na<sup>+</sup> compartmentation, the synthesis of compatible solutes and



592 production of enzymes responsible for reactive oxygen species (ROS) metabolism are  
593 reported to be essential in plant growth maintenance (Flowers & Colmer, 2008, Munns &  
594 Tester, 2008). Specific signalling pathway mechanisms, such as those for ROS, which have  
595 been shown to play a role in regulating vasculature  $\text{Na}^+$  concentrations (Mittler,  
596 Vanderauwera, Suzuki, Miller, Tognetti, Vandepoele, Gollery, Shulaev & Van Breusegem,  
597 2011, Suzuki, Koussevitzky, Mittler & Miller, 2012), or  $\text{Ca}^{2+}$  pathways, which regulate gene  
598 expression and protein activities (Kudla, Batistič & Hashimoto, 2010, Thoday-Kennedy,  
599 Jacobs & Roy, 2015), could also be important for the plant and/or cell's ability to tolerate  
600 high concentrations of shoot  $\text{Na}^+$ . Therefore, future studies towards improving salinity  
601 tolerance of bread wheat should focus on identifying genetics and physiological mechanisms  
602 involved in the plant's tolerance to high shoot  $\text{Na}^+$  (tissue tolerance) rather than preferentially  
603 focusing on  $\text{Na}^+$  exclusion. This will now be easier, knowing it is possible for wheat to  
604 survive high shoot  $\text{Na}^+$  concentrations.

605

606 In summary, this study identified a bread wheat landrace, Mocho de Espiga Branca, that  
607 maintains shoot growth while accumulating very high leaf  $\text{Na}^+$  concentrations under salinity -  
608 a novel bread wheat line with tissue tolerance. A naturally occurring SNP variation in the  
609 coding region of *TaHKT1;5-D* of Mocho de Espiga Branca results in the amino acid residue  
610 substitution L190P in the  $\text{Na}^+$  transporter TaHKT1;5-D, and this single substitution appeared  
611 to negatively affect the  $\text{Na}^+$  transport function of the protein, which results in high leaf  $\text{Na}^+$   
612 concentrations. Access to both Mocho de Espiga Branca and the CAPS marker ts12SALTY-  
613 4D for tracking the SNP variation in TaHKT1;5-D will enable plant breeders to develop  
614 salinity tolerant bread wheat varieties in the future.

615

616

617 **Acknowledgements**

618 This project was funded by the Grains Research and Development Corporation (GRDC):  
619 Project UA00145, UA00151, and the GRDC and the International Wheat Yield Partnership  
620 (IWYP): Projects IWYP39/ACP0009; IWYP60/ANU00027. The Australian Centre for Plant  
621 Functional Genomics (ACPFG) was jointly funded by the Australian Research Council (ARC)  
622 and the GRDC, SW was supported by the ARC DE160100804. The Plant Accelerator<sup>®</sup>,  
623 Australian Plant Phenomics Facility, is funded under the National Collaborative Research  
624 Infrastructure Strategy (NCRIS). We acknowledge the Cereal Genetic Resource Centre (GRC)  
625 INRA Clermont-Ferrand, Assoc. Prof. Kenneth Chalmers and Dr. Melissa Garcia for  
626 providing seeds. We thank The Plant Accelerator<sup>®</sup> for assisting with the glasshouse  
627 experiments and Adelaide microscopy for assistance with imaging. We also thank Prof. Rana  
628 Munns (CSIRO, Black Mountain, Canberra and University of Western Australia, Perth,  
629 Australia) for valuable comments and discussion on the manuscript. CB thanks the China  
630 Scholarship Council and the University of Adelaide Joint Postgraduate Scholarships Program  
631 for her PhD stipend, and acknowledges the Research Travel Scholarship and the Global  
632 Learning Travel Grant at the University of Adelaide and The Plant Nutrition Trust for  
633 financial support to attend conferences. The authors declare that they have no conflict of  
634 interest.

635

## 636 **References**

- 637 Ashraf M. & O'leary J. (1996). Responses of some newly developed salt-tolerant genotypes  
638 of spring wheat to salt stress: 1. Yield components and ion distribution. *Journal of*  
639 *Agronomy and Crop Science*, 176, 91-101.
- 640 Batistic O., Sorek N., Schultke S., Yalovsky S. & Kudla J. (2008). Dual fatty acyl  
641 modification determines the localization and plasma membrane targeting of CBL/CIPK  
642 Ca<sup>2+</sup> signaling complexes in *Arabidopsis*. *The Plant Cell*, 20, 1346-1362.
- 643 Bose J., Rodrigo-Moreno A., Lai D., Xie Y., Shen W. & Shabala S. (2015). Rapid regulation  
644 of the plasma membrane H<sup>+</sup>-ATPase activity is essential to salinity tolerance in two  
645 halophyte species, *Atriplex lentiformis* and *Chenopodium quinoa*. *Annals of Botany*,  
646 115, 481-494.
- 647 Boursier P. & Läuchli A. (1989). Mechanisms of chloride partitioning in the leaves of salt-  
648 stressed *Sorghum bicolor* L. *Physiologia Plantarum*, 77, 537-544.
- 649 Boursier P., Lynch J., Lauchli A. & Epstein E. (1987). Chloride partitioning in leaves of salt-  
650 stressed sorghum, maize, wheat and barley. *Functional Plant Biology*, 14, 463-473.
- 651 Brien C. (2014). Dae: Functions useful in the design and ANOVA of experiments. R package  
652 version 2.3-1.
- 653 Brooks B.R., Brooks C.L., Mackerell A.D., Nilsson L., Petrella R.J., Roux B., Won Y.,  
654 Archontis G., Bartels C., Boresch S., Caflisch A., Caves L., Cui Q., Dinner A.R., Feig  
655 M., Fischer S., Gao J., Hodoscek M., Im W., Kuczera K., Lazaridis T., Ma J.,  
656 Ovchinnikov V., Paci E., Pastor R.W., Post C.B., Pu J.Z., Schaefer M., Tidor B.,  
657 Venable R.M., Woodcock H.L., Wu X., Yang W., York D.M. & Karplus M. (2009).  
658 CHARMM: The biomolecular simulation program. *Journal of Computational*  
659 *Chemistry*, 30, 1545-1614.

- 660 Byrt C.S., Xu B., Krishnan M., Lightfoot D.J., Athman A., Jacobs A.K., Watson-Haigh N.S.,  
661 Plett D., Munns R., Tester M. & Gilliham M. (2014). The Na<sup>+</sup> transporter, TaHKT1;5-  
662 D, limits shoot Na<sup>+</sup> accumulation in bread wheat. *The Plant Journal*, 80, 516-526.
- 663 Celniker G., Nimrod G., Ashkenazy H., Glaser F., Martz E., Mayrose I., Pupko T. & Ben-Tal  
664 N. (2013). ConSurf: Using evolutionary data to raise testable hypotheses about protein  
665 function. *Israel Journal of Chemistry*, 53, 199-206.
- 666 Coombes N. (2009). DiGger design search tool in R. In: *New South Wales Department of*  
667 *Primary Industry) Available at <http://nswdpiobiom.org/austatgen/software/> [Verified 29*  
668 *August 2017].*
- 669 Cotsaftis O., Plett D., Shirley N., Tester M. & Hrmova M. (2012). A two-staged model of  
670 Na<sup>+</sup> exclusion in rice explained by 3D modeling of HKT transporters and alternative  
671 splicing. *PLoS ONE*, 7, e39865.
- 672 Curtis M.D. & Grossniklaus U. (2003). A gateway cloning vector set for high-throughput  
673 functional analysis of genes in planta. *Plant Physiology*, 133, 462-469.
- 674 Eswar N., Eramian D., Webb B., Shen M.-Y. & Sali A. (2008). Protein structure modeling  
675 with MODELLER. In: *Structural Proteomics: High-Throughput Methods* (eds B. Kobe,  
676 M. Guss, & T. Huber), pp. 145-159. Human Press, Totowa, NJ.
- 677 FAO (2019a). FAO Soils portal. Available at [http://www.fao.org/soils-portal/soil-](http://www.fao.org/soils-portal/soil-management/management-of-some-problem-soils/salt-affected-soils/more-information-on-salt-affected-soils/en/)  
678 [management/management-of-some-problem-soils/salt-affected-soils/more-information-](http://www.fao.org/soils-portal/soil-management/management-of-some-problem-soils/salt-affected-soils/more-information-on-salt-affected-soils/en/)  
679 [on-salt-affected-soils/en/](http://www.fao.org/soils-portal/soil-management/management-of-some-problem-soils/salt-affected-soils/more-information-on-salt-affected-soils/en/) [Accessed 26 May 2019].
- 680 FAO (2019b). FAOSTAT. Available at <http://www.fao.org/faostat/en/#data/QC> [Accessed  
681 26 May 2019].
- 682 Flowers T.J. & Colmer T.D. (2008). Salinity tolerance in halophytes. *New Phytologist*, 179,  
683 945-963.

- 684 Garcia M., Eckermann P., Haefele S., Satija S., Sznajder B., Timmins A., Baumann U.,  
685 Wolters P., Mather D.E. & Fleury D. (2019). Genome-wide association mapping of  
686 grain yield in a diverse collection of spring wheat (*Triticum aestivum* L.) evaluated in  
687 southern Australia. *PLoS ONE*, 14, e0211730.
- 688 Genc Y., McDonald G.K. & Tester M. (2007). Reassessment of tissue Na<sup>+</sup> concentration as a  
689 criterion for salinity tolerance in bread wheat. *Plant Cell and Environment*, 30, 1486-  
690 1498.
- 691 Genc Y., Oldach K., Gogel B., Wallwork H., McDonald G.K. & Smith A.B. (2013).  
692 Quantitative trait loci for agronomic and physiological traits for a bread wheat  
693 population grown in environments with a range of salinity levels. *Molecular Breeding*,  
694 32, 39-59.
- 695 Genc Y., Taylor J., Lyons G.H., Li Y., Cheong J., Appelbee M., Oldach K. & Sutton T.  
696 (2019). Bread wheat with high salinity and sodicity tolerance. *Frontiers in Plant*  
697 *Science*, 10, 1280.
- 698 Hamamoto S., Horie T., Hauser F., Deinlein U., Schroeder J.I. & Uozumi N. (2015). HKT  
699 transporters mediate salt stress resistance in plants: from structure and function to the  
700 field. *Current Opinion in Biotechnology*, 32, 113-120.
- 701 Henderson S.W., Wege S., Qiu J., Blackmore D.H., Walker A.R., Tyerman S.D., Walker R.R.  
702 & Gilliham M. (2015). Grapevine and arabidopsis cation-chloride cotransporters  
703 localize to the golgi and trans-golgi network and indirectly influence long-distance ion  
704 transport and plant salt tolerance. *Plant Physiology*, 169, 2215-2229.
- 705 James R.A., Davenport R.J. & Munns R. (2006). Physiological characterization of two genes  
706 for Na<sup>+</sup> exclusion in durum wheat, *Nax1* and *Nax2*. *Plant Physiology*, 142, 1537-1547.
- 707 Kudla J., Batistič O. & Hashimoto K. (2010). Calcium signals: the lead currency of plant  
708 information processing. *The Plant Cell*, 22, 541-563.

- 709 Landau M., Mayrose I., Rosenberg Y., Glaser F., Martz E., Pupko T. & Ben-Tal N. (2005).  
710 ConSurf 2005: the projection of evolutionary conservation scores of residues on protein  
711 structures. *Nucleic Acids Research*, 33, W299-W302.
- 712 Laskowski R.A., Macarthur M.W., Moss D.S. & Thornton J.M. (1993). PROCHECK: a  
713 program to check the stereochemical quality of protein structures. *Journal of Applied*  
714 *Crystallography*, 26, 283-291.
- 715 Mittler R., Vanderauwera S., Suzuki N., Miller G., Tognetti V.B., Vandepoele K., Gollery M.,  
716 Shulaev V. & Van Breusegem F. (2011). ROS signaling: the new wave? *Trends in*  
717 *Plant Science*, 16, 300-309.
- 718 Moller I.S., Gilliham M., Jha D., Mayo G.M., Roy S.J., Coates J.C., Haseloff J. & Tester M.  
719 (2009). Shoot Na<sup>+</sup> exclusion and increased salinity tolerance engineered by cell type-  
720 specific alteration of Na<sup>+</sup> transport in *Arabidopsis*. *The Plant Cell*, 21, 2163-2178.
- 721 Munns R., James R.A., Xu B., Athman A., Conn S.J., Jordans C., Byrt C.S., Hare R.A.,  
722 Tyerman S.D., Tester M., Plett D. & Gilliham M. (2012). Wheat grain yield on saline  
723 soils is improved by an ancestral Na<sup>+</sup> transporter gene. *Nature Biotechnology*, 30, 360-  
724 364.
- 725 Munns R., Rebetzke G.J., Husain S., James R.A. & Hare R.A. (2003). Genetic control of  
726 sodium exclusion in durum wheat. *Australian Journal of Agricultural Research*, 54,  
727 627-635.
- 728 Munns R. & Tester M. (2008). Mechanisms of salinity tolerance. *Annual Review of Plant*  
729 *Biology*, 59, 651-681.
- 730 Newman I.A. (2001). Ion transport in roots: measurement of fluxes using ion-selective  
731 microelectrodes to characterize transporter function. *Plant Cell and Environment*, 24, 1-  
732 14.

733 Pettersen E.F., Goddard T.D., Huang C.C., Couch G.S., Greenblatt D.M., Meng E.C. &  
734 Ferrin T.E. (2004). UCSF Chimera - a visualization system for exploratory research and  
735 analysis. *Journal of Computational Chemistry*, 25, 1605-1612.

736 Platten J.D., Cotsaftis O., Berthomieu P., Bohnert H., Davenport R.J., Fairbairn D.J., Horie T.,  
737 Leigh R.A., Lin H.X., Luan S., Maser P., Pantoja O., Rodriguez-Navarro A.,  
738 Schachtman D.P., Schroeder J.I., Sentenac H., Uozumi N., Very A.A., Zhu J.K., Dennis  
739 E.S. & Tester M. (2006). Nomenclature for *HKT* transporters, key determinants of plant  
740 salinity tolerance. *Trends in Plant Science*, 11, 372-374.

741 Poustini K. & Siosemardeh A. (2004). Ion distribution in wheat cultivars in response to  
742 salinity stress. *Field Crops Research*, 85, 125-133.

743 R Core Team (2014). R: a language and environment for statistical computing. R Foundation  
744 for statistical computing, Vienna.

745 Rogowsky P.M., Guidet F.L.Y., Langridge P., Shepherd K.W. & Koebner R.M.D. (1991).  
746 Isolation and characterization of wheat-rye recombinants involving chromosome arm  
747 1ds of wheat. *Theoretical and Applied Genetics*, 82, 537-544.

748 Sali A. & Blundell T.L. (1993). Comparative protein modeling by satisfaction of spatial  
749 restraints. *Journal of Molecular Biology*, 234, 779-815.

750 Schymkowitz J.W.H., Rousseau F., Martins I.C., Ferkinghoff-Borg J., Stricher F. & Serrano  
751 L. (2005) Prediction of water and metal binding sites and their affinities by using the  
752 Fold-X force field. *Proceedings of the National Academy of Sciences of the United  
753 States of America*, 102, 10147-10152.

754 Shen M.Y. & Sali A. (2006). Statistical potential for assessment and prediction of protein  
755 structures. *Protein Science*, 15, 2507-2524.

756 Sippl M.J. (1993). Recognition of errors in three-dimensional structures of proteins. *Proteins-  
757 Structure Function and Genetics*, 17, 355-362.

- 758 Suzuki N., Koussevitzky S., Mittler R. & Miller G. (2012). ROS and redox signalling in the  
759 response of plants to abiotic stress. *Plant, Cell & Environment*, 35, 259-270.
- 760 Tester M. & Langridge P. (2010). Breeding technologies to increase crop production in a  
761 changing world. *Science*, 327, 818-822.
- 762 Thoday-Kennedy E.L., Jacobs A.K. & Roy S.J. (2015). The role of the CBL–CIPK calcium  
763 signalling network in regulating ion transport in response to abiotic stress. *Plant  
764 Growth Regulation*, 76, 3-12.
- 765 Tilbrook J., Schilling R.K., Berger B., Garcia A.F., Trittermann C., Coventry S., Rabie H.,  
766 Brien C., Nguyen M. & Tester M. (2017). Variation in shoot tolerance mechanisms not  
767 related to ion toxicity in barley. *Functional Plant Biology*, 44, 1194-1206.
- 768 van Bezouw R.F., Janssen E.M., Ashrafuzzaman M., Ghahramanzadeh R., Kilian B., Graner  
769 A., Visser R.G. & van der Linden C.G. (2019). Shoot sodium exclusion in salt stressed  
770 barley (*Hordeum vulgare* L.) is determined by allele specific increased expression of  
771 *HKT1; 5*. *Journal of Plant Physiology*, 241, 153029.
- 772 Vieira-Pires R.S., Szollosi A. & Morais-Cabral J.H. (2013). The structure of the KtrAB  
773 potassium transporter. *Nature*, 496, 323-328.
- 774 Waters S., Gilliam M. & Hrmova M. (2013). Plant high-affinity potassium (HKT)  
775 transporters involved in salinity tolerance: structural insights to probe differences in ion  
776 selectivity. *International Journal of Molecular Sciences*, 14, 7660-7680.
- 777 Xu B., Waters S., Byrt C.S., Plett D., Tyerman S.D., Tester M., Munns R., Hrmova M. &  
778 Gilliam M. (2018). Structural variations in wheat HKT1;5 underpin differences in Na<sup>+</sup>  
779 transport capacity. *Cellular and Molecular Life Sciences*, 75, 1133-1144.
- 780
- 781
- 782



## 783 **Figure Legends**

784 **Figure 1.** Salinity tolerance and 4<sup>th</sup> leaf Na<sup>+</sup> concentration of Mocho de Espiga Branca  
785 relative to 72 bread wheat diversity lines and two Australian cultivars Gladius and Scout in  
786 soil with 100 mM NaCl. The 4<sup>th</sup> leaf Na<sup>+</sup> concentration is determined 11 days after treatment  
787 with 100 mM NaCl. Salinity tolerance is defined as projected shoot area (PSA) under 100  
788 mM NaCl relative to 0 mM NaCl determined from the final day of imaging. Data presented  
789 as means ( $n = 3-4$  except for Gladius and Scout, where  $n = 12$ ). The standard error of the  
790 mean (SEM) for the 4<sup>th</sup> leaf Na<sup>+</sup> concentration is presented in Table S1.

791

792 **Figure 2.** Na<sup>+</sup> concentration in the 4<sup>th</sup> leaf blade, sheath, and roots of Mocho de Espiga  
793 Branca, Gladius and Scout in hydroponics. (a) Representative image of 6 weeks old plants  
794 from the hydroponic experiment with 0, 150 and 200 mM NaCl treatments applied at the  
795 emergence of the 4<sup>th</sup> leaf. M = Mocho de Espiga Branca, G = Gladius and S = Scout. Na<sup>+</sup>  
796 concentration in (b) 4<sup>th</sup> leaf blade; (c) 4<sup>th</sup> leaf sheath and (d) roots determined 21 days after  
797 treatments with 0, 150 and 200 mM NaCl. Data presented as means  $\pm$  SEM ( $n = 14$ ). Bars  
798 with different letters indicate significant differences determined by two-way ANOVA with  
799 Tukey's multiple comparison test at  $p \leq 0.05$ .

800

801 **Figure 3.** A SNP in Mocho de Espiga Branca *TaHKT1;5-D* results in a L190P amino acid  
802 residue variation in the Na<sup>+</sup> transporter TaHKT1;5-D. (a) Partial alignment of *TaHKT1;5-D*  
803 coding and amino acid sequences in Mocho de Espiga Branca, Gladius and Scout compared  
804 to Chinese Spring. (b) Schematic of the TaHKT1;5-D protein showing the transmembrane  $\alpha$ -  
805 helices (TMH 1-9) and selectivity filter  $\alpha$ -helices (SFH 1-4) adapted from Xu et al. (2018);  
806 the Na<sup>+</sup> selectivity filter motif S78-G233-G353-G457 indicated in blank circles and location  
807 of the L190P variant indicated in a grey circle. (c) Molecular models of TaHKT1;5-D (left,

808 yellow) and TaHKT1;5-D L190P (right, salmon) transport proteins in cartoon representations  
809 with cylindrical  $\alpha$ -helices illustrating 3D folds. Constrictions in selectivity filters are bound  
810 by four residues (cpk magenta sticks) that contain Na<sup>+</sup> ions (violet spheres). Black arrows  
811 illustrate directional flows of Na<sup>+</sup> that are likely to enter the permeation trajectory by-passing  
812 selectivity filter constrictions. Variant residues L190 and L190P (cpk sticks and dots, bold  
813 types) between wild-type TaHKT1;5-D and the L190P mutant are indicated; the dots  
814 illustrate volumes of van der Waals radii. **(d)** Detailed views of  $\alpha$ -helices, which neighbour  
815 selectivity filter constriction, containing Na<sup>+</sup> (violet spheres), located near selectivity filter  
816 residues S78, G233, G353, G457 (cpk magenta) for TaHKT1;5-D (left) and the L190P  
817 mutant (right), which are crucial for permeation function. In each protein, polar contacts (cpk  
818 sticks and dots) of L190 (TaHKT1;5-D) and L190P (TaHKT1;5-D L190P) positioned on  $\alpha$ -  
819 helices 4, are indicated by dashed lines (separations between 2.6 Å and 3.2 Å).

820

821 **Figure 4.** The physiological characterisation of L190P variation in TaHKT1;5-D and the  
822 evaluation of the xylem sap Na<sup>+</sup> concentration in Mocho de Espiga Branca. **(a)** Current-  
823 voltage (I-V) curve observed from Mocho de Espiga Branca (blue) or Gladius (red)  
824 *TaHKT1;5-D* cRNA-injected or H<sub>2</sub>O-injected (black) *X. laevis* oocytes exposed to 1 mM Na<sup>+</sup>  
825 and 30 mM Na<sup>+</sup> glutamate at a voltage range from -120 to +40 mV. Data represents means  $\pm$   
826 SEM ( $n = 3-5$ ). **(b)** Transient co-expression of GFP-TaHKT1;5-D variants with a plasma  
827 membrane marker in *N. benthamiana* epidermal cells. Leaves were co-infiltrated with  
828 *Agrobacterium tumefaciens* strains harbouring either GFP-TaHKT1;5-D L190 (Gladius) or  
829 L190P (Mocho de Espiga Branca) and a plasma membrane marker CBL1n-RFP. GFP signal  
830 is shown in green in the left panel while RFP-signal is shown in magenta in the middle panel.  
831 Representative images are shown. Scale bars = 10  $\mu$ m. **(c)** The xylem sap Na<sup>+</sup> concentration  
832 of Mocho de Espiga Branca and Gladius under 0 and 150 mM NaCl concentrations. Xylem

833 sap was collected from hydroponically grown plants 21 days after 0 and 150 mM NaCl was  
834 applied at the emergence of 4<sup>th</sup> leaf. Bars with different letters indicate significant differences  
835 determined by two-way ANOVA with Tukey's multiple comparison test at  $p \leq 0.05$ .

836

837 **Figure 5.** Ion fluxes measured at the root elongation zone after removal from 100 mM NaCl.

838 Six to seven days old Mocho de Espiga Branca or Gladius seedlings were treated with 100  
839 mM NaCl for two days before removal from the solution, the resultant ion fluxes were  
840 measured at the elongation zone (between 200 to 600  $\mu\text{m}$  from the root cap) of the primary  
841 root of the plants for 25 min. Net (a)  $\text{Na}^+$ ; (b)  $\text{K}^+$  and (c)  $\text{H}^+$  fluxes. Cumulative total (d)  $\text{Na}^+$ ;  
842 (e)  $\text{K}^+$  and (f)  $\text{H}^+$  fluxes over 25 min. Data presented as means  $\pm$  SEM ( $n = 8-9$ ).

843

844 **Figure 6.** Ion transport model for Mocho de Espiga Branca and Gladius plants under NaCl

845 stress. Colour intensity of the arrows is proportional to the measured ion concentrations, with  
846 a greater intensity representing a higher concentration. At the root elongation zone, the  
847 direction of the arrow indicates the direction of the ion flux, EP = epidermis, CO = cortex,  
848 ED = endodermis, SP = stellar parenchyma and XY = xylem apoplast. TaHKT1;5-D L190P in  
849 Mocho de Espiga Branca and TaHKT1;5-D L190 in Gladius are indicated as a white circle.

850 The TaHKT1;5-D L190P variant in Mocho de Espiga Branca leads to reduced retrieval of  
851  $\text{Na}^+$  from the xylem into the roots resulting in a greater influx of  $\text{Na}^+$  in the xylem sap and a  
852 higher accumulation of  $\text{Na}^+$  in the leaf blade and sheath compared to Gladius. Mocho de  
853 Espiga Branca also has greater  $\text{Na}^+$  influx at the root elongation zone compared to Gladius.  
854 There was no difference in root  $\text{Na}^+$  concentration between the two cultivars. The  $\text{K}^+$   
855 concentration was also similar between Mocho de Espiga Branca and Gladius both in the  
856 roots and xylem sap, however, Mocho de Espiga Branca had less  $\text{K}^+$  in the leaf blade and  
857 sheath compared to Gladius. In both cultivars, a high concentration of  $\text{Cl}^-$  was transported in

858 the xylem sap and accumulated to a high concentration in the leaf sheath compared to leaf  
859 blade.

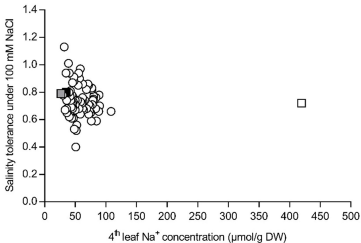

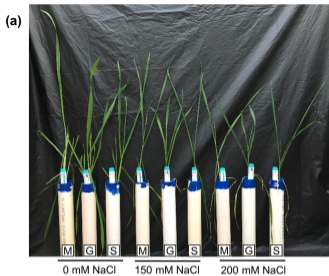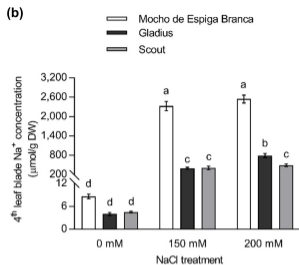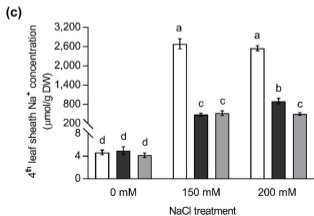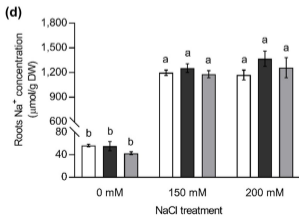

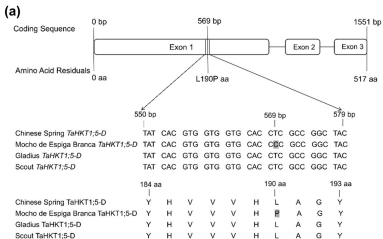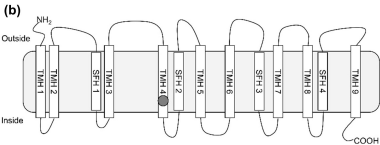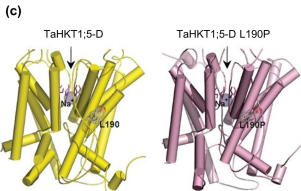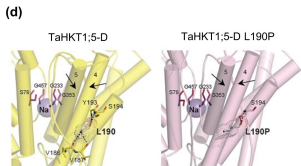

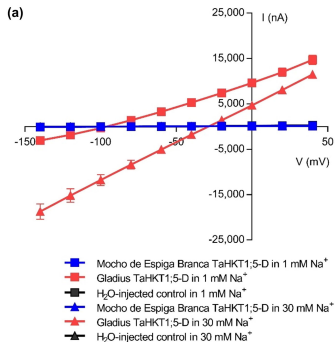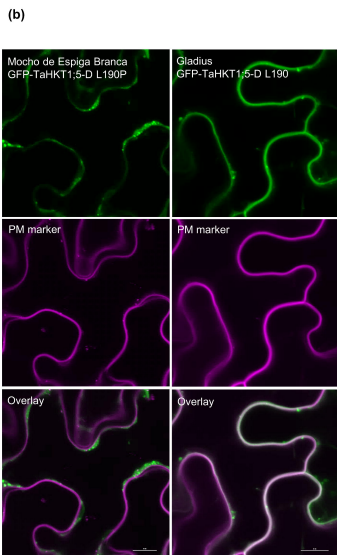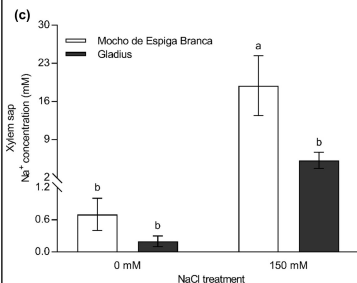



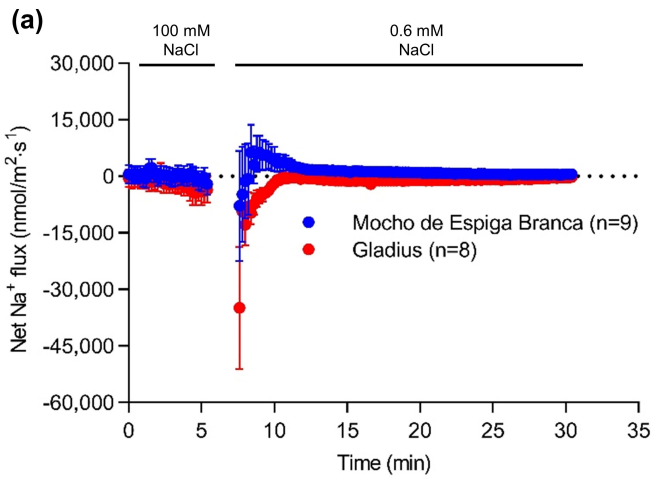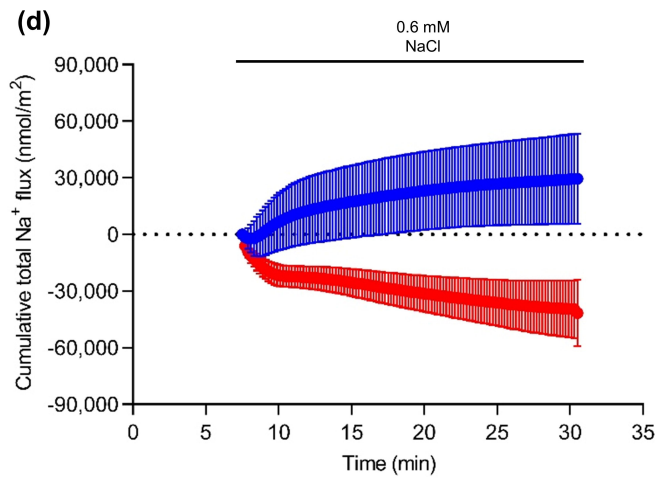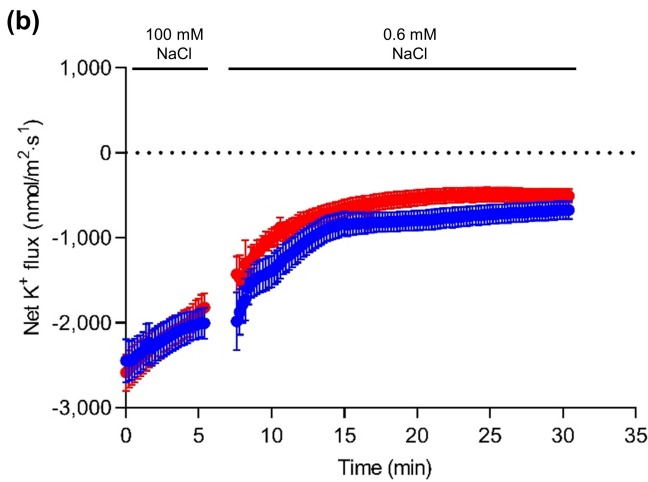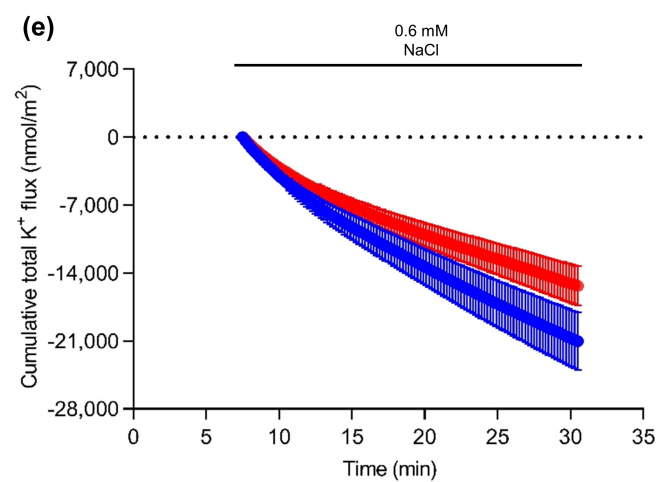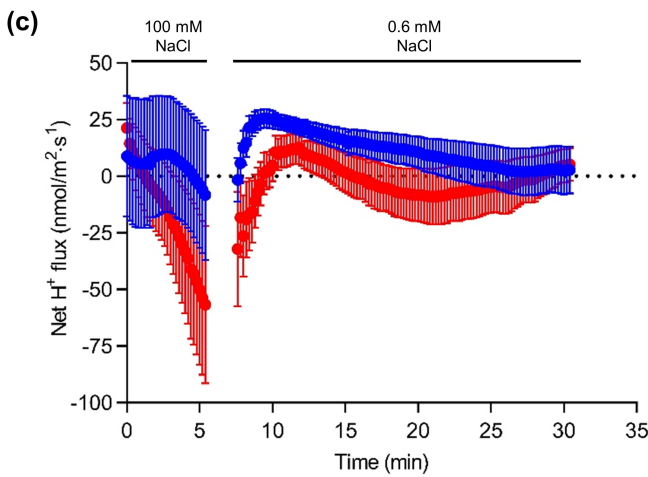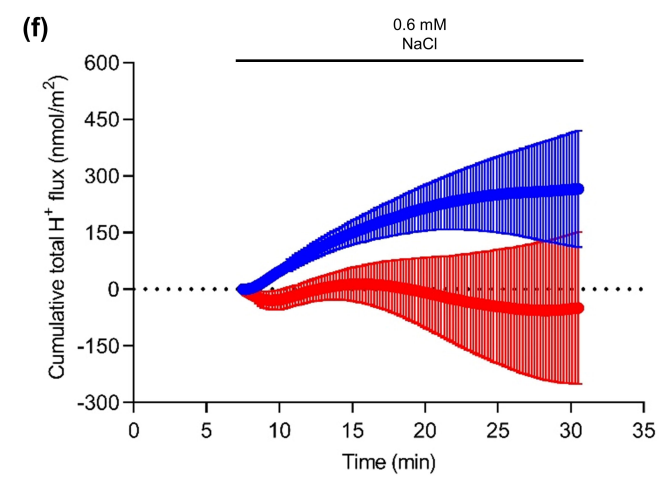

# NaCl

## Mocho de Espiga Branca

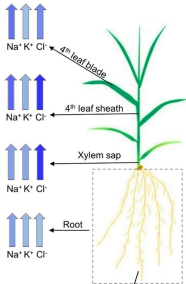

## Gladius

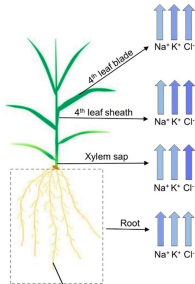

Root elongation zone

Root elongation zone

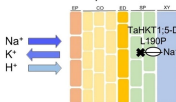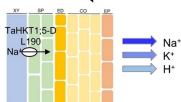

Source: https://www.biorxiv.org/content/10.1101/2020.01.21.909887v1.full.pdf
